# Supplementary material
Source: PubMed Central journal article supplement (PMC3430531)
Supplement: supp_112.141051_FigureS1.pdf [file supp_112.141051_FigureS1.pdf]

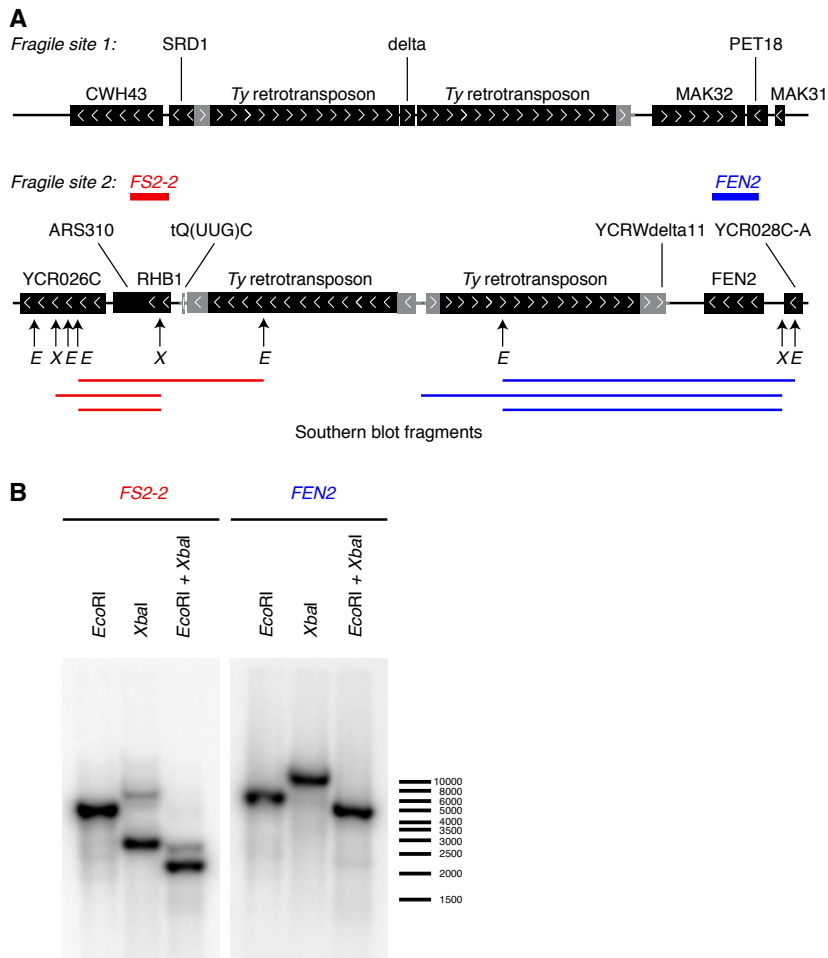

**FIGURE S1.** Restriction map and Southern blot analysis of the *FS2* region of chromosome III. (A) Restriction digest map of *S. cerevisiae* strain BY4741. Regions of the genome that were confirmed by PCR and sequence analysis are shaded in grey. The map is drawn to scale and restriction enzyme cut sites are indicated for *EcoRI* (*E*) and *XbaI* (*X*). The positions of the Southern blot hybridization probes, *FS2-2* and *FEN2*, and the expected fragment sizes are depicted above and below the map, respectively. (B) Restriction digest and Southern blot analysis using genomic DNA isolated from BY4741 yielded fragment sizes that correspond to the restriction digest map and confirm the presence of an inverted pair of *Ty1* retrotransposons at the *FS2* position of chromosome III.
