# Supplementary material
Source: PubMed Central journal article supplement (PMC3430531)
Supplement: supp_112.141051_FigureS2.pdf [file supp_112.141051_FigureS2.pdf]

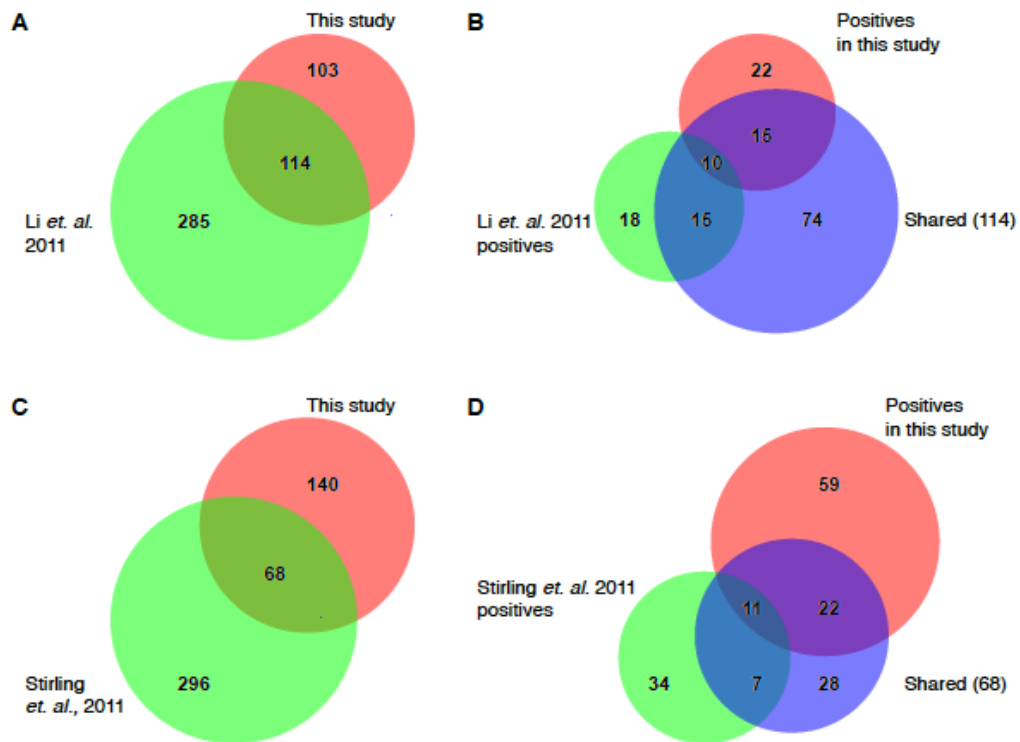

**FIGURE S2.** Comparison of Ddc2 foci and a-like faker genome instability screens. (A) Comparison of genes screened in our study with those screened by Li *et. al.* using ts-alleles. (B) Comparison of Ddc2 foci positives in our study and in Li *et. al.* with the set of genes screened in both studies. (C) Comparison of genes screened in our study with those screened by Stirling *et. al.* using a combination of ts-alleles and DAMP alleles. (D) Comparison of a-like faker positives in our study and in Stirling *et. al.* with the set of genes screened in both studies.
